# Supplementary material for: Factors Determining Patients’ Choice Between Mobile Health and Telemedicine: Predictive Analytics Assessment
Source: PubMed Central journal article supplement (PMC6592402; doi:10.2196/13772), 2019-06-08
Supplement: mhealth_v7i6e13772_app1.pdf [file mhealth_v7i6e13772_app1.pdf]

Multimedia Appendix 1: Top 20 chief concerns.

| Chief complaints                 | Counts |
|----------------------------------|--------|
| Urinary tract infection          | 150    |
| Sinus infection                  | 141    |
| Sore throat                      | 136    |
| Cough                            | 92     |
| Rash                             | 53     |
| Ear pain                         | 44     |
| Fever                            | 41     |
| Nasal congestion                 | 35     |
| Animal or insect bite or scratch | 34     |
| Cold                             | 32     |
| Headache                         | 29     |
| Refill                           | 28     |
| Pink eye                         | 26     |
| Yeast infection                  | 23     |
| Allergy                          | 18     |
| Congestion                       | 18     |
| Dental                           | 18     |
| Urination problem                | 16     |
| Vaginal discharge                | 15     |
| Ear congestion                   | 13     |
| Others                           | 441    |
